# Supplementary material
Source: publisher site journal article supplement (https://www.dovepress.com/get_supplementary_file.php?f=327313.docx)

**Supplemental Table 1.** Primers used in this study.

| SNP ID | 2nd-PCRP | 1st-PCRP | UEP_SEQ |
| --- | --- | --- | --- |
| rs11572325 | ACGTTGGATGTTGTTGTGCCCAAAGTCAGG | ACGTTGGATGCATTACTTGTTCTGATGCTC | GTCAGGAAATATCAGCTTGA |
| rs10889160 | ACGTTGGATGGGATAATGAGAGGAAGTTGC | ACGTTGGATGGTAGATTACATCAGATTCC | GGGAGAAAATCGAACTTTGTG |
| rs890293 | ACGTTGGATGTGGCATCTTCGCAGGGTGCT | ACGTTGGATGTGCTCTTCTGCGGTCCAAG | tGGGCACGGCTGGGAGC |
| rs1760217 | ACGTTGGATGAAAACCTATTCCCCTGTCTG | ACGTTGGATGCATCTCTCTTGAAACCTGAC | gGTCTGAAATTTAATGCTACACAATG |
| rs1801159 | ACGTTGGATGTGCGCTAGCAAGACCAAAAG | ACGTTGGATGCTCCTATTGATCTGGTGGAC | GCAAGACCAAAAGGATTTA |
| rs1801265 | ACGTTGGATGATCCTGGCTTTAAATCCTCG | ACGTTGGATGCTTGTCTAATTTCTTGGCCG | CACAAACTCATGCAACTCTG |
| rs5275 | ACGTTGGATGCACTGTCGATGTTTCCAATG | ACGTTGGATGTGCACTGATACCTGTTTTTG | agGTTTGAAATTTTAAAGTACTTTTGGT |
| rs20417 | ACGTTGGATGACAGGGTAACTGCTTAGGAC | ACGTTGGATGACTGTTCTCCGTACCTTCAC | ggattAGGAGAATTTACCTTTCCC |
| rs12139527 | ACGTTGGATGGTTGCCATGATGAAGTTTGC | ACGTTGGATGAAGACCCCACTCAGCCTACT | GTTTGCATCAGCTGCC |
| rs13374149 | ACGTTGGATGCACAAGATCCACGCACCAAC | ACGTTGGATGATGGTTGCTGTTGCCATAGG | ACCAACCCCCTGGCTC |
| rs3850625 | ACGTTGGATGGGAAGTTCTACGCCACATTC | ACGTTGGATGTGGGCCGATAGCCATAATAC | TCCGGAAGTTCATGAAA |
| rs2306238 | ACGTTGGATGGGGAGTACTGGATAGAGTC | ACGTTGGATGAGATGGGTCTAATCCCTCAG | tttTAGAGTCCTCTAGTCTAGGT |
| rs2231142 | ACGTTGGATGTGATGTTGTGATGGGCACTC | ACGTTGGATGGTCATAGTTGTTGCAAGCCG | aTGACGGTGAGAGAAAACTTA |
| rs2231137 | ACGTTGGATGTCAGGTCATTGGAAGCTGTC | ACGTTGGATGGATGTCTTCCAGTAATGTCG | gcatgGGTGTTTCCTTGTGACA |
| rs698 | ACGTTGGATGAGAGCGAAGCAGGTCAAATC | ACGTTGGATGTCCCCAAACTTGTGGCTGAC | CTTCATTTATTTTTTCAAAAGGTAAAA |
| rs776746 | ACGTTGGATGGTAATGTGGTCCAAACAGGG | ACGTTGGATGATGTACCACCCAGCTTAACG | cgCCAAACAGGGAAGAGATA |
| rs2242480 | ACGTTGGATGTGCTAAGGTTTCACCTCCTC | ACGTTGGATGGCAGGAGGAAATTGATGCAG | ttaACCTCCTCCCTCCTTCTCCATGTA |
| rs1805123 | ACGTTGGATGGCAAGCGCAAGTTGTCCTTC | ACGTTGGATGTAAAGCAGACACGGCCCAC | agcaGCAGGCGCACGGACA |
| rs4646244 | ACGTTGGATGTACATACCTCTGGCATGCTG | ACGTTGGATGTTGTAGTCCATCTGCCCAAG | GCATGCTGCCACATGA |
| rs4271002 | ACGTTGGATGCCCAAAGGTAACACACAATG | ACGTTGGATGGCAGAAACAAAGCCATATGA | aATGCATGTGGTATAAGTGT |
| rs1041983 | ACGTTGGATGAGACCACAATGTTAGGAGGG | ACGTTGGATGCAGGAGAAGGTGAACCATGC | CAATGTTAGGAGGGTATTTTTA |
| rs1801280 | ACGTTGGATGCAAATACAGCACTGGCATGG | ACGTTGGATGGACCCAGCATCGACAATGTA | TCCTGCAGGTGACCA |
| rs1799929 | ACGTTGGATGGGCAGGAGATGAGAATTAAG | ACGTTGGATGTTCTGCTTGACAGAAGAGAG | cttcgCTCTCCTGATTTGGTCCA |
| rs1799930 | ACGTTGGATGCCTGCCAAAGAAGAAACACC | ACGTTGGATGAAGATGTTGGAGACGTCTGC | ccagACTTATTTACGCTTGAACCTC |
| rs1208 | ACGTTGGATGACAATACAGATCTGGTCGAG | ACGTTGGATGATTTCTCCCCAAGGAAATC | GGTTGAAGAAGTGCTGA |
| rs1799931 | ACGTTGGATGGGGTGATACATACACAAGGG | ACGTTGGATGGGAAGAGGTTGAAGAAGTGC | CCTTATTCTAAATAGTAAGGGAT |
| rs1495741 | ACGTTGGATGTCTCTCAGGAAAGGAGCAAA | ACGTTGGATGGGCCTCACATGGTCACTTC | tCTGAAGGATGATTTTCATAATAAT |
| rs2115819 | ACGTTGGATGTTTGTGTAACACTGGGATGG | ACGTTGGATGGCCACAGGAGATTTTAGTTC | ccaTGGGATGGAAAGGGT |
| rs12248560 | ACGTTGGATGCAAATTTGTGTCTTCTGTTC | ACGTTGGATGGGATTTGAGCTGAGGTCTTC | TTGTGTCTTCTGTTCTCAAAG |
| rs4244285 | ACGTTGGATGGCAATAATTTTCCCACTATC | ACGTTGGATGTCCATCGATTCTTGGTGTTC | CCCACTATCATTGATTATTTCCC |
| rs1057910 | ACGTTGGATGATGCAAGACAGGAGCCACAT | ACGTTGGATGTGTCACAGGTCACTGCATGG | ccctACGAGGTCCAGAGATAC |
| rs11572103 | ACGTTGGATGGCTAATATCTTACCTGCTCC | ACGTTGGATGTGGATGTTAACAATCCTCGG | TTACCTGCTCCATTTTGA |
| rs7909236 | ACGTTGGATGTTTCTCCATCATCACAGCAC | ACGTTGGATGGCCAATCTAGGAGATTCTGG | cccTCACAGCACATTGGAA |
| rs17110453 | ACGTTGGATGACACTGATTTCCCTCAAGGT | ACGTTGGATGCTGTGATGATGGAGAAACAC | ccTTCCCTCAAGGTCATAAA |
| rs3813867 | ACGTTGGATGCAACGCCCCTTCTTGGTTCA | ACGTTGGATGGCAAGTCATTGGTTGTGCTG | CCTTCTTGGTTCAGGAGAG |
| rs2031920 | ACGTTGGATGGTTCTTAATTCATAGGTTGC | ACGTTGGATGCAAGTGATTTGGCTGGATTG | TTAATTCATAGGTTGCAATTTT |
| rs6413432 | ACGTTGGATGTCCCAAGTAACTGGGCCACA | ACGTTGGATGCTGTGCCCAGCCAAAATAAT | aCACACCCAGCTGATTAAAAATT |
| rs2070676 | ACGTTGGATGATCCTTCACTAAGCAACTCC | ACGTTGGATGGAAACCCCCAGTGAAGAATG | aatgCACTAAGCAACTCCTTCAACT |
| rs5219 | ACGTTGGATGCGTTGCAGTTGCCTTTCTTG | ACGTTGGATGAGGAATACGTGCTGACACGC | cggtCACGGTACCTGGGCT |
| rs1801028 | ACGTTGGATGAGCCACCACCAGCTGACTCT | ACGTTGGATGATTCTTCTCTGGTTTGGCGG | cacccGCTGACTCTCCCCGACCCGT |
| rs2306283 | ACGTTGGATGACCTTTTCCCACTATCTCAG | ACGTTGGATGGATGTTCTTACAGTTACAGG | ttGATGTTGAATTTTCTGATGAAT |
| rs4516035 | ACGTTGGATGTTTCCTCCTCTGTAAGAGGC | ACGTTGGATGCAGTCGATGACCTCCTTTAG | cggcAGAGGCGAATAGCAAT |
| rs762551 | ACGTTGGATGCTAAGCTCCATCTACCATGC | ACGTTGGATGGAATCTTGAGGCTCCTTTCC | CTACCATGCGTCCTG |
| rs2472304 | ACGTTGGATGAACCCTATAGCCAGGAGAAG | ACGTTGGATGACACAGCAGGCACATAACAG | CCAGGAGAAGCCTTGA |
| rs750155 | ACGTTGGATGCATCTCCACTGGGTGGAGG | ACGTTGGATGAGAGTCCAGCTGCACTGAG | GGGTCCCAGCAGGAA |
| rs1800764 | ACGTTGGATGAAGACAACCCATGGGATGAG | ACGTTGGATGCTTGGAATGTACCCACTGAG | TGCAAAGTATGTACAGCA |
| rs4291 | ACGTTGGATGCAGAGGAAGCTGGAGAAAGG | ACGTTGGATGTCGGGTGTTCCGGCAAACTG | ccccGGGCCTCCTCTCTTT |
| rs4267385 | ACGTTGGATGAGCCAGGTTATCTCTCTAGG | ACGTTGGATGGATTGCACAGCCCATAAGAG | tcttaTAACTTGACCTCTTATGTTCAC |
| rs2108622 | ACGTTGGATGCTAGGAGCCTTGGAATGGAC | ACGTTGGATGTGCCTCATCAGTGTTTTCGG | CCTCAGGGTCCGGCCACA |
| rs3093105 | ACGTTGGATGATGTCCCAGCTGAGCCTGT | ACGTTGGATGTGTCATAGAAGGCGTAGGTC | agaCTGTCCTGGCTGGGCCTC |
| rs8192726 | ACGTTGGATGTCCTCGTCCTGGGTGTTTTC | ACGTTGGATGGGCTTCCTCATCGACGCCC | TCCTTCTCCTGCCCC |
| rs1051298 | ACGTTGGATGTGGCACATACCAAGGCCAG | ACGTTGGATGCTTCTGAAGTGTGTCCATCC | gAAGGCCAGCACGTCC |
| rs1051296 | ACGTTGGATGTCTGAAGTGTGTCCATCCTG | ACGTTGGATGATACCAAGGCCAGCACGTC | tAGCTGCTCCCACACT |
| rs1131596 | ACGTTGGATGACCATCCTGCTCAGGCCAC | ACGTTGGATGATCTTCCAAGGTGCCCTGAC | GGGGACGAAGGTGAC |
| rs1065852 | ACGTTGGATGTGCTCCTGGTGGACCTGATG | ACGTTGGATGTGGAAGTCCACATGCAGCAG | cccctCTGGGCTGCACGCTAC |

*Abbreviation*: SNP: single nucleotide polymorphism; PCRP: PCR primer; UEP: unique base extension primer

**Supplemental Table 2**. The genotype and allele frequency distribution of seven SNPs among 27 populations.

| rs750155 | CC | TC | TT | C | T | Total |
| --- | --- | --- | --- | --- | --- | --- |
| Blang | 0(0.00%) | 93(46.50%) | 107(53.50%) | 93(23.25%) | 307(76.75%) | 200(100.00%) |
| CDX | 19(20.43%) | 55(59.14%) | 19(20.43%) | 93(50.00%) | 93(50.00%) | 93(100.00%) |
| CHB | 38(36.89%) | 48(46.60%) | 17(16.50%) | 124(60.19%) | 82(39.81%) | 103(100.00%) |
| CHS | 18(17.14%) | 66(62.86%) | 21(20.00%) | 102(48.57%) | 108(51.43%) | 105(100.00%) |
| JPT | 40(38.46%) | 53(50.96%) | 11(10.58%) | 133(63.94%) | 75(36.06%) | 104(100.00%) |
| KHV | 22(22.22%) | 62(62.63%) | 15(15.15%) | 106(53.54%) | 92(46.46%) | 99(100.00%) |
| BEB | 46(53.49%) | 37(43.02%) | 3(3.49%) | 129(75.00%) | 43(25.00%) | 86(100.00%) |
| GIH | 46(44.66%) | 39(37.86%) | 18(17.48%) | 131(63.59%) | 75(36.41%) | 103(100.00%) |
| ITU | 51(50.00%) | 44(43.14%) | 7(6.86%) | 146(71.57%) | 58(28.43%) | 102(100.00%) |
| PJL | 43(44.79%) | 45(46.88%) | 8(8.33%) | 131(68.23%) | 61(31.77%) | 96(100.00%) |
| STU | 65(63.73%) | 32(31.37%) | 5(4.90%) | 162(79.41%) | 42(20.59%) | 102(100.00%) |
| CEU | 30(30.30%) | 52(52.53%) | 17(17.17%) | 112(56.57%) | 86(43.43%) | 99(100.00%) |
| FIN | 20(20.20%) | 60(60.61%) | 19(19.19%) | 100(50.51%) | 98(49.49%) | 99(100.00%) |
| GBR | 28(30.77%) | 46(50.55%) | 17(18.68%) | 102(56.04%) | 80(43.96%) | 91(100.00%) |
| IBS | 32(29.91%) | 60(56.07%) | 15(14.02%) | 124(57.94%) | 90(42.06%) | 107(100.00%) |
| TSI | 36(33.64%) | 54(50.47%) | 17(15.89%) | 126(58.88%) | 88(41.12%) | 107(100.00%) |
| ACB | 30(31.25%) | 51(53.13%) | 15(15.63%) | 111(57.81%) | 81(42.19%) | 96(100.00%) |
| ASW | 24(39.34%) | 29(47.54%) | 8(13.11%) | 77(63.11%) | 45(36.89%) | 61(100.00%) |
| ESN | 49(49.49%) | 37(37.37%) | 13(13.13%) | 135(68.18%) | 63(31.82%) | 99(100.00%) |
| GWD | 58(51.33%) | 50(44.25%) | 5(4.42%) | 166(73.45%) | 60(26.55%) | 113(100.00%) |
| LWK | 37(37.37%) | 52(52.53%) | 10(10.10%) | 126(63.64%) | 72(36.36%) | 99(100.00%) |
| MSL | 30(35.29%) | 52(61.18%) | 3(3.53%) | 112(65.88%) | 58(34.12%) | 85(100.00%) |
| YRI | 46(42.59%) | 52(48.15%) | 10(9.26%) | 144(66.67%) | 72(33.33%) | 108(100.00%) |
| CLM | 23(24.47%) | 46(48.94%) | 25(26.60%) | 92(48.94%) | 96(51.06%) | 94(100.00%) |
| MXL | 15(23.44%) | 33(51.56%) | 16(25.00%) | 63(49.22%) | 65(50.78%) | 64(100.00%) |
| PEL | 4(4.71%) | 20(23.53%) | 61(71.76%) | 28(16.47%) | 142(83.53%) | 85(100.00%) |
| PUR | 38(36.54%) | 45(43.27%) | 21(20.19%) | 121(58.17%) | 87(41.83%) | 104(100.00%) |
| rs1800764 | CC | TC | TT | C | T | Total |
| Blang | 0(0.00%) | 73(36.50%) | 127(63.50%) | 73(18.25%) | 327(81.75%) | 200(100.00%) |
| CDX | 13(13.98%) | 42(45.16%) | 38(40.86%) | 68(36.56%) | 118(63.44%) | 93(100.00%) |
| CHB | 12(11.65%) | 40(38.83%) | 51(49.51%) | 64(31.07%) | 142(68.93%) | 103(100.00%) |
| CHS | 10(9.52%) | 50(47.62%) | 45(42.86%) | 70(33.33%) | 140(66.67%) | 105(100.00%) |
| JPT | 19(18.27%) | 55(52.88%) | 30(28.85%) | 93(44.71%) | 115(55.29%) | 104(100.00%) |
| KHV | 16(16.16%) | 37(37.37%) | 46(46.46%) | 69(34.85%) | 129(65.15%) | 99(100.00%) |
| BEB | 13(15.12%) | 41(47.67%) | 32(37.21%) | 67(38.95%) | 105(61.05%) | 86(100.00%) |
| GIH | 19(18.45%) | 55(53.40%) | 29(28.16%) | 93(45.15%) | 113(54.85%) | 103(100.00%) |
| ITU | 19(18.63%) | 45(44.12%) | 38(37.25%) | 83(40.69%) | 121(59.31%) | 102(100.00%) |
| PJL | 15(15.63%) | 45(46.88%) | 36(37.50%) | 75(39.06%) | 117(60.94%) | 96(100.00%) |
| STU | 13(12.75%) | 51(50.00%) | 38(37.25%) | 77(37.75%) | 127(62.25%) | 102(100.00%) |
| CEU | 25(25.25%) | 43(43.43%) | 31(31.31%) | 93(46.97%) | 105(53.03%) | 99(100.00%) |
| FIN | 17(17.17%) | 55(55.56%) | 27(27.27%) | 89(44.95%) | 109(55.05%) | 99(100.00%) |
| GBR | 19(20.88%) | 41(45.05%) | 31(34.07%) | 79(43.41%) | 103(56.59%) | 91(100.00%) |
| IBS | 18(16.82%) | 55(51.40%) | 34(31.78%) | 91(42.52%) | 123(57.48%) | 107(100.00%) |
| TSI | 30(28.04%) | 48(44.86%) | 29(27.10%) | 108(50.47%) | 106(49.53%) | 107(100.00%) |
| ACB | 71(73.96%) | 22(22.92%) | 3(3.13%) | 164(85.42%) | 28(14.58%) | 96(100.00%) |
| ASW | 40(65.57%) | 16(26.23%) | 5(8.20%) | 96(78.69%) | 26(21.31%) | 61(100.00%) |
| ESN | 83(83.84%) | 16(16.16%) | 0(0.00%) | 182(91.92%) | 16(8.08%) | 99(100.00%) |
| GWD | 100(88.50%) | 13(11.50%) | 0(0.00%) | 213(94.25%) | 13(5.75%) | 113(100.00%) |
| LWK | 76(76.77%) | 21(21.21%) | 2(2.02%) | 173(87.37%) | 25(12.63%) | 99(100.00%) |
| MSL | 78(91.76%) | 6(7.06%) | 1(1.18%) | 162(95.29%) | 8(4.71%) | 85(100.00%) |
| YRI | 96(88.89%) | 12(11.11%) | 0(0.00%) | 204(94.44%) | 12(5.56%) | 108(100.00%) |
| CLM | 20(21.28%) | 46(48.94%) | 28(29.79%) | 86(45.74%) | 102(54.26%) | 94(100.00%) |
| MXL | 8(12.50%) | 24(37.50%) | 32(50.00%) | 40(31.25%) | 88(68.75%) | 64(100.00%) |
| PEL | 5(5.88%) | 28(32.94%) | 52(61.18%) | 38(22.35%) | 132(77.65%) | 85(100.00%) |
| PUR | 21(20.19%) | 54(51.92%) | 29(27.88%) | 96(46.15%) | 112(53.85%) | 104(100.00%) |
| rs4291 | AA | TA | TT | A | T | Total |
| Blang | 1(0.50%) | 199(99.50%) | 0(0.00%) | 201(50.25%) | 199(49.75%) | 200(100.00%) |
| CDX | 39(41.94%) | 41(44.09%) | 13(13.98%) | 119(63.98%) | 67(36.02%) | 93(100.00%) |
| CHB | 53(51.46%) | 38(36.89%) | 12(11.65%) | 144(69.90%) | 62(30.10%) | 103(100.00%) |
| CHS | 48(45.71%) | 46(43.81%) | 11(10.48%) | 142(67.62%) | 68(32.38%) | 105(100.00%) |
| JPT | 32(30.77%) | 53(50.96%) | 19(18.27%) | 117(56.25%) | 91(43.75%) | 104(100.00%) |
| KHV | 46(46.46%) | 37(37.37%) | 16(16.16%) | 129(65.15%) | 69(34.85%) | 99(100.00%) |
| BEB | 36(41.86%) | 39(45.35%) | 11(12.79%) | 111(64.53%) | 61(35.47%) | 86(100.00%) |
| GIH | 36(34.95%) | 50(48.54%) | 17(16.50%) | 122(59.22%) | 84(40.78%) | 103(100.00%) |
| ITU | 46(45.10%) | 38(37.25%) | 18(17.65%) | 130(63.73%) | 74(36.27%) | 102(100.00%) |
| PJL | 41(42.71%) | 43(44.79%) | 12(12.50%) | 125(65.10%) | 67(34.90%) | 96(100.00%) |
| STU | 44(43.14%) | 48(47.06%) | 10(9.80%) | 136(66.67%) | 68(33.33%) | 102(100.00%) |
| CEU | 40(40.40%) | 44(44.44%) | 15(15.15%) | 124(62.63%) | 74(37.37%) | 99(100.00%) |
| FIN | 37(37.37%) | 53(53.54%) | 9(9.09%) | 127(64.14%) | 71(35.86%) | 99(100.00%) |
| GBR | 41(45.05%) | 38(41.76%) | 12(13.19%) | 120(65.93%) | 62(34.07%) | 91(100.00%) |
| IBS | 42(39.25%) | 52(48.60%) | 13(12.15%) | 136(63.55%) | 78(36.45%) | 107(100.00%) |
| TSI | 39(36.45%) | 47(43.93%) | 21(19.63%) | 125(58.41%) | 89(41.59%) | 107(100.00%) |
| ACB | 39(40.63%) | 45(46.88%) | 12(12.50%) | 123(64.06%) | 69(35.94%) | 96(100.00%) |
| ASW | 30(49.18%) | 26(42.62%) | 5(8.20%) | 86(70.49%) | 36(29.51%) | 61(100.00%) |
| ESN | 45(45.45%) | 44(44.44%) | 10(10.10%) | 134(67.68%) | 64(32.32%) | 99(100.00%) |
| GWD | 36(31.86%) | 59(52.21%) | 18(15.93%) | 131(57.96%) | 95(42.04%) | 113(100.00%) |
| LWK | 51(51.52%) | 37(37.37%) | 11(11.11%) | 139(70.20%) | 59(29.80%) | 99(100.00%) |
| MSL | 32(37.65%) | 43(50.59%) | 10(11.76%) | 107(62.94%) | 63(37.06%) | 85(100.00%) |
| YRI | 46(42.59%) | 41(37.96%) | 21(19.44%) | 133(61.57%) | 83(38.43%) | 108(100.00%) |
| CLM | 40(42.55%) | 43(45.74%) | 11(11.70%) | 123(65.43%) | 65(34.57%) | 94(100.00%) |
| MXL | 37(57.81%) | 22(34.38%) | 5(7.81%) | 96(75.00%) | 32(25.00%) | 64(100.00%) |
| PEL | 59(69.41%) | 22(25.88%) | 4(4.71%) | 140(82.35%) | 30(17.65%) | 85(100.00%) |
| PUR | 47(45.19%) | 49(47.12%) | 8(7.69%) | 143(68.75%) | 65(31.25%) | 104(100.00%) |
| rs1051298 | GG | AG | AA | G | A | Total |
| Blang | 0(0.00%) | 183(91.50%) | 17(8.50%) | 183(45.75%) | 217(54.25%) | 200(100.00%) |
| CDX | 18(19.35%) | 44(47.31%) | 31(33.33%) | 80(43.01%) | 106(56.99%) | 93(100.00%) |
| CHB | 27(26.21%) | 49(47.57%) | 27(26.21%) | 103(50.00%) | 103(50.00%) | 103(100.00%) |
| CHS | 14(13.33%) | 61(58.10%) | 30(28.57%) | 89(42.38%) | 121(57.62%) | 105(100.00%) |
| JPT | 21(20.19%) | 49(47.12%) | 34(32.69%) | 91(43.75%) | 117(56.25%) | 104(100.00%) |
| KHV | 14(14.14%) | 49(49.49%) | 36(36.36%) | 77(38.89%) | 121(61.11%) | 99(100.00%) |
| BEB | 16(18.60%) | 43(50.00%) | 27(31.40%) | 75(43.60%) | 97(56.40%) | 86(100.00%) |
| GIH | 18(17.48%) | 48(46.60%) | 37(35.92%) | 84(40.78%) | 122(59.22%) | 103(100.00%) |
| ITU | 21(20.59%) | 51(50.00%) | 30(29.41%) | 93(45.59%) | 111(54.41%) | 102(100.00%) |
| PJL | 22(22.92%) | 50(52.08%) | 24(25.00%) | 94(48.96%) | 98(51.04%) | 96(100.00%) |
| STU | 22(21.57%) | 45(44.12%) | 35(34.31%) | 89(43.63%) | 115(56.37%) | 102(100.00%) |
| CEU | 33(33.33%) | 52(52.53%) | 14(14.14%) | 118(59.60%) | 80(40.40%) | 99(100.00%) |
| FIN | 28(28.28%) | 51(51.52%) | 20(20.20%) | 107(54.04%) | 91(45.96%) | 99(100.00%) |
| GBR | 35(38.46%) | 38(41.76%) | 18(19.78%) | 108(59.34%) | 74(40.66%) | 91(100.00%) |
| IBS | 28(26.17%) | 45(42.06%) | 34(31.78%) | 101(47.20%) | 113(52.80%) | 107(100.00%) |
| TSI | 33(30.84%) | 54(50.47%) | 20(18.69%) | 120(56.07%) | 94(43.93%) | 107(100.00%) |
| ACB | 14(14.58%) | 43(44.79%) | 39(40.63%) | 71(36.98%) | 121(63.02%) | 96(100.00%) |
| ASW | 13(21.31%) | 29(47.54%) | 19(31.15%) | 55(45.08%) | 67(54.92%) | 61(100.00%) |
| ESN | 21(21.21%) | 54(54.55%) | 24(24.24%) | 96(48.48%) | 102(51.52%) | 99(100.00%) |
| GWD | 19(16.81%) | 44(38.94%) | 50(44.25%) | 82(36.28%) | 144(63.72%) | 113(100.00%) |
| LWK | 23(23.23%) | 45(45.45%) | 31(31.31%) | 91(45.96%) | 107(54.04%) | 99(100.00%) |
| MSL | 15(17.65%) | 40(47.06%) | 30(35.29%) | 70(41.18%) | 100(58.82%) | 85(100.00%) |
| YRI | 20(18.52%) | 54(50.00%) | 34(31.48%) | 94(43.52%) | 122(56.48%) | 108(100.00%) |
| CLM | 26(27.66%) | 47(50.00%) | 21(22.34%) | 99(52.66%) | 89(47.34%) | 94(100.00%) |
| MXL | 29(45.31%) | 24(37.50%) | 11(17.19%) | 82(64.06%) | 46(35.94%) | 64(100.00%) |
| PEL | 34(40.00%) | 33(38.82%) | 18(21.18%) | 101(59.41%) | 69(40.59%) | 85(100.00%) |
| PUR | 29(27.88%) | 54(51.92%) | 21(20.19%) | 112(53.85%) | 96(46.15%) | 104(100.00%) |
| rs1051296 | AA | CA | CC | A | C | Total |
| Blang | 9(4.50%) | 156(78.00%) | 35(17.50%) | 174(43.50%) | 226(56.50%) | 200(100.00%) |
| CDX | 17(18.28%) | 45(48.39%) | 31(33.33%) | 79(42.47%) | 107(57.53%) | 93(100.00%) |
| CHB | 27(26.21%) | 47(45.63%) | 29(28.16%) | 101(49.03%) | 105(50.97%) | 103(100.00%) |
| CHS | 14(13.33%) | 61(58.10%) | 30(28.57%) | 89(42.38%) | 121(57.62%) | 105(100.00%) |
| JPT | 21(20.19%) | 49(47.12%) | 34(32.69%) | 91(43.75%) | 117(56.25%) | 104(100.00%) |
| KHV | 15(15.15%) | 49(49.49%) | 35(35.35%) | 79(39.90%) | 119(60.10%) | 99(100.00%) |
| BEB | 18(20.93%) | 47(54.65%) | 21(24.42%) | 83(48.26%) | 89(51.74%) | 86(100.00%) |
| GIH | 22(21.36%) | 53(51.46%) | 28(27.18%) | 97(47.09%) | 109(52.91%) | 103(100.00%) |
| ITU | 29(28.43%) | 52(50.98%) | 21(20.59%) | 110(53.92%) | 94(46.08%) | 102(100.00%) |
| PJL | 26(27.08%) | 47(48.96%) | 23(23.96%) | 99(51.56%) | 93(48.44%) | 96(100.00%) |
| STU | 26(25.49%) | 49(48.04%) | 27(26.47%) | 101(49.51%) | 103(50.49%) | 102(100.00%) |
| CEU | 33(33.33%) | 52(52.53%) | 14(14.14%) | 118(59.60%) | 80(40.40%) | 99(100.00%) |
| FIN | 28(28.28%) | 51(51.52%) | 20(20.20%) | 107(54.04%) | 91(45.96%) | 99(100.00%) |
| GBR | 35(38.46%) | 38(41.76%) | 18(19.78%) | 108(59.34%) | 74(40.66%) | 91(100.00%) |
| IBS | 28(26.17%) | 46(42.99%) | 33(30.84%) | 102(47.66%) | 112(52.34%) | 107(100.00%) |
| TSI | 34(31.78%) | 53(49.53%) | 20(18.69%) | 121(56.54%) | 93(43.46%) | 107(100.00%) |
| ACB | 16(16.67%) | 50(52.08%) | 30(31.25%) | 82(42.71%) | 110(57.29%) | 96(100.00%) |
| ASW | 18(29.51%) | 29(47.54%) | 14(22.95%) | 65(53.28%) | 57(46.72%) | 61(100.00%) |
| ESN | 29(29.29%) | 51(51.52%) | 19(19.19%) | 109(55.05%) | 89(44.95%) | 99(100.00%) |
| GWD | 30(26.55%) | 55(48.67%) | 28(24.78%) | 115(50.88%) | 111(49.12%) | 113(100.00%) |
| LWK | 26(26.26%) | 42(42.42%) | 31(31.31%) | 94(47.47%) | 104(52.53%) | 99(100.00%) |
| MSL | 19(22.35%) | 44(51.76%) | 22(25.88%) | 82(48.24%) | 88(51.76%) | 85(100.00%) |
| YRI | 27(25.00%) | 57(52.78%) | 24(22.22%) | 111(51.39%) | 105(48.61%) | 108(100.00%) |
| CLM | 26(27.66%) | 47(50.00%) | 21(22.34%) | 99(52.66%) | 89(47.34%) | 94(100.00%) |
| MXL | 29(45.31%) | 24(37.50%) | 11(17.19%) | 82(64.06%) | 46(35.94%) | 64(100.00%) |
| PEL | 35(41.18%) | 32(37.65%) | 18(21.18%) | 102(60.00%) | 68(40.00%) | 85(100.00%) |
| PUR | 30(28.85%) | 53(50.96%) | 21(20.19%) | 113(54.33%) | 95(45.67%) | 104(100.00%) |
| rs1131596 | AA | AG | GG | A | G | Total |
| Blang | 14(7.00%) | 167(83.50%) | 19(9.50%) | 195(48.75%) | 205(51.25%) | 200(100.00%) |
| CDX | 27(29.03%) | 46(49.46%) | 20(21.51%) | 100(53.76%) | 86(46.24%) | 93(100.00%) |
| CHB | 24(23.30%) | 50(48.54%) | 29(28.16%) | 98(47.57%) | 108(52.43%) | 103(100.00%) |
| CHS | 24(22.86%) | 64(60.95%) | 17(16.19%) | 112(53.33%) | 98(46.67%) | 105(100.00%) |
| JPT | 32(30.77%) | 49(47.12%) | 23(22.12%) | 113(54.33%) | 95(45.67%) | 104(100.00%) |
| KHV | 26(26.26%) | 55(55.56%) | 18(18.18%) | 107(54.04%) | 91(45.96%) | 99(100.00%) |
| BEB | 11(12.79%) | 45(52.33%) | 30(34.88%) | 67(38.95%) | 105(61.05%) | 86(100.00%) |
| GIH | 15(14.56%) | 51(49.51%) | 37(35.92%) | 81(39.32%) | 125(60.68%) | 103(100.00%) |
| ITU | 16(15.69%) | 49(48.04%) | 37(36.27%) | 81(39.71%) | 123(60.29%) | 102(100.00%) |
| PJL | 20(20.83%) | 41(42.71%) | 35(36.46%) | 81(42.19%) | 111(57.81%) | 96(100.00%) |
| STU | 21(20.59%) | 46(45.10%) | 35(34.31%) | 88(43.14%) | 116(56.86%) | 102(100.00%) |
| CEU | 14(14.14%) | 57(57.58%) | 28(28.28%) | 85(42.93%) | 113(57.07%) | 99(100.00%) |
| FIN | 20(20.20%) | 50(50.51%) | 29(29.29%) | 90(45.45%) | 108(54.55%) | 99(100.00%) |
| GBR | 20(21.98%) | 33(36.26%) | 38(41.76%) | 73(40.11%) | 109(59.89%) | 91(100.00%) |
| IBS | 33(30.84%) | 46(42.99%) | 28(26.17%) | 112(52.34%) | 102(47.66%) | 107(100.00%) |
| TSI | 23(21.50%) | 50(46.73%) | 34(31.78%) | 96(44.86%) | 118(55.14%) | 107(100.00%) |
| ACB | 53(55.21%) | 33(34.38%) | 10(10.42%) | 139(72.40%) | 53(27.60%) | 96(100.00%) |
| ASW | 22(36.07%) | 32(52.46%) | 7(11.48%) | 76(62.30%) | 46(37.70%) | 61(100.00%) |
| ESN | 37(37.37%) | 54(54.55%) | 8(8.08%) | 128(64.65%) | 70(35.35%) | 99(100.00%) |
| GWD | 72(63.72%) | 31(27.43%) | 10(8.85%) | 175(77.43%) | 51(22.57%) | 113(100.00%) |
| LWK | 57(57.58%) | 37(37.37%) | 5(5.05%) | 151(76.26%) | 47(23.74%) | 99(100.00%) |
| MSL | 48(56.47%) | 30(35.29%) | 7(8.24%) | 126(74.12%) | 44(25.88%) | 85(100.00%) |
| YRI | 56(51.85%) | 44(40.74%) | 8(7.41%) | 156(72.22%) | 60(27.78%) | 108(100.00%) |
| CLM | 24(25.53%) | 45(47.87%) | 25(26.60%) | 93(49.47%) | 95(50.53%) | 94(100.00%) |
| MXL | 12(18.75%) | 21(32.81%) | 31(48.44%) | 45(35.16%) | 83(64.84%) | 64(100.00%) |
| PEL | 14(16.47%) | 35(41.18%) | 36(42.35%) | 63(37.06%) | 107(62.94%) | 85(100.00%) |
| PUR | 20(19.23%) | 51(49.04%) | 33(31.73%) | 91(43.75%) | 117(56.25%) | 104(100.00%) |
| rs1065852 | AA | GA | GG | A | G | Total |
| Blang | 0(0.00%) | 200(100.00%) | 0(0.00%) | 200(50.00%) | 200(50.00%) | 200(100.00%) |
| CDX | 40(43.01%) | 37(39.78%) | 16(17.20%) | 117(62.90%) | 69(37.10%) | 93(100.00%) |
| CHB | 38(36.89%) | 48(46.60%) | 17(16.50%) | 124(60.19%) | 82(39.81%) | 103(100.00%) |
| CHS | 44(41.90%) | 41(39.05%) | 20(19.05%) | 129(61.43%) | 81(38.57%) | 105(100.00%) |
| JPT | 15(14.42%) | 45(43.27%) | 44(42.31%) | 75(36.06%) | 133(63.94%) | 104(100.00%) |
| KHV | 42(42.42%) | 47(47.47%) | 10(10.10%) | 131(66.16%) | 67(33.84%) | 99(100.00%) |
| BEB | 9(10.47%) | 26(30.23%) | 51(59.30%) | 44(25.58%) | 128(74.42%) | 86(100.00%) |
| GIH | 2(1.94%) | 27(26.21%) | 74(71.84%) | 31(15.05%) | 175(84.95%) | 103(100.00%) |
| ITU | 3(2.94%) | 29(28.43%) | 70(68.63%) | 35(17.16%) | 169(82.84%) | 102(100.00%) |
| PJL | 1(1.04%) | 18(18.75%) | 77(80.21%) | 20(10.42%) | 172(89.58%) | 96(100.00%) |
| STU | 4(3.92%) | 23(22.55%) | 75(73.53%) | 31(15.20%) | 173(84.80%) | 102(100.00%) |
| CEU | 5(5.05%) | 38(38.38%) | 56(56.57%) | 48(24.24%) | 150(75.76%) | 99(100.00%) |
| FIN | 3(3.03%) | 23(23.23%) | 73(73.74%) | 29(14.65%) | 169(85.35%) | 99(100.00%) |
| GBR | 8(8.79%) | 29(31.87%) | 54(59.34%) | 45(24.73%) | 137(75.27%) | 91(100.00%) |
| IBS | 4(3.74%) | 29(27.10%) | 74(69.16%) | 37(17.29%) | 177(82.71%) | 107(100.00%) |
| TSI | 5(4.67%) | 34(31.78%) | 68(63.55%) | 44(20.56%) | 170(79.44%) | 107(100.00%) |
| ACB | 3(3.13%) | 22(22.92%) | 71(73.96%) | 28(14.58%) | 164(85.42%) | 96(100.00%) |
| ASW | 3(4.92%) | 13(21.31%) | 45(73.77%) | 19(15.57%) | 103(84.43%) | 61(100.00%) |
| ESN | 2(2.02%) | 14(14.14%) | 83(83.84%) | 18(9.09%) | 180(90.91%) | 99(100.00%) |
| GWD | 3(2.65%) | 20(17.70%) | 90(79.65%) | 26(11.50%) | 200(88.50%) | 113(100.00%) |
| LWK | 0(0.00%) | 7(7.07%) | 92(92.93%) | 7(3.54%) | 191(96.46%) | 99(100.00%) |
| MSL | 4(4.71%) | 20(23.53%) | 61(71.76%) | 28(16.47%) | 142(83.53%) | 85(100.00%) |
| YRI | 2(1.85%) | 19(17.59%) | 87(80.56%) | 23(10.65%) | 193(89.35%) | 108(100.00%) |
| CLM | 6(6.38%) | 23(24.47%) | 65(69.15%) | 35(18.62%) | 153(81.38%) | 94(100.00%) |
| MXL | 1(1.56%) | 17(26.56%) | 46(71.88%) | 19(14.84%) | 109(85.16%) | 64(100.00%) |
| PEL | 1(1.18%) | 10(11.76%) | 74(87.06%) | 12(7.06%) | 158(92.94%) | 85(100.00%) |
| PUR | 7(6.73%) | 23(22.12%) | 74(71.15%) | 37(17.79%) | 171(82.21%) | 104(100.00%) |

*Abbreviation*: EAS: East Asian, SAS: South Asian, EUR: European, AFR: African, AMR: American, CDX: Chinese Dai in Xishuangbanna, China, CHB: Han Chinese in Beijing, China, CHS: Southern Han Chinese, China, JPT: Japanese in Tokyo, Japan, KHV: Kinh in Ho Chi Minh City, Vietnam, BEB: Bengali in Bangladesh, GIH: Gujarati Indian in Houston, Texas, ITU: Indian Telugu in the UK, PJL: Punjabi in Lahore, Pakistan, STU: Sri Lankan Tamil in the UK, CEU: Western European ancestry, FIN: Finnish in Finland, GBR: British in England and Scotland, IBS: Iberian populations in Spain, TSI: Toscani in Italy, ACB: African Caribbeans in Barbados, ASW: African Ancestry in Southwest USA, ESN: Esan in Nigeria, GWD: Gambian in Western Divisions, The Gambia, LWK: Luhya in Webuye, Kenya, MSL: Mende in Sierra Leone, YRI: Yoruba in Ibadan, Nigeria, CLM: Colombian in Medellin, Colombia, MXL: Mexican Ancestry in Los Angeles, Colombia, PEL: Peruvian in Lima, Peru , PUR: Puerto Rican in Puerto Rico.

| Level of evidence | Variant | Gene | Molecule | Type | Phenotype |
| --- | --- | --- | --- | --- | --- |
| Level 3 | rs4291 | *ACE* | captopril | Efficacy | Alzheimer Disease |
| Level 3 | rs4291 | *ACE* | aspirin | Toxicity/ADR | Asthma |
| Level 3 | rs4291 | *ACE* | amlodipinechlorthalidonelisinopril | Efficacy | Hypertension |
| Level 3 | rs1051298 | *SLC19A1* | pemetrexed | Efficacy | Carcinoma, Non-Small-Cell LungMesothelioma |
| Level 3 | rs1065852 | *CYP2D6* | escitalopram | Efficacy | Depressive Disorder, Major |
| Level 3 | rs1065852 | *CYP2D6* | iloperidone | Toxicity/ADR | Schizophrenia |

**Supplemental Table 3.** Clinical Annotations of selected SNPs.

*Abbreviations*: *ACE*:Angiotensin-converting enzyme, *SLC19A1*: Solute Carrier Family 19 Member 1, *CYP2D6*: Cytochrome P450 Family 2 Subfamily D Member 6.

*Note*: The clinical annotation of SNPs were retrieved from PharmGKB database.

**Supplemental Table 4.** Variant annotations of 5 significantly different SNPs between Blang population and other 26 populations.

| Variant | PMID | Molecules | Association | Singnificant | *p*-value | #Of case | #Of control | Study size | Bipgeographical group | Paper discusses | Gene | More Details |
| --- | --- | --- | --- | --- | --- | --- | --- | --- | --- | --- | --- | --- |
| rs750155 | 23670235 | ABT-751 | Allele T is not associated with ABT-751 pharmacokinetic parameters when treated with ABT-751 in people with Neoplasms as compared to allele C. | no |  | 47 |  | 47 | Mixed Population | metabolism/PK | *SULT1A1* | p-value>0.05 |
| rs750155 | 15970794 |  | Allele T is associated with increased activity of SULT1A1 platelets. | not stated |  |  |  |  | SULT1A1 | in Caucasians but decreased activity in African Americans. |  |  |
| rs4291 | 27262302 | sertraline | Genotype TT is not associated with response to sertraline in people with Depressive Disorder. | no | 0.803 | 55 | 71 | 126 | Near Eastern | efficacy | *ACE* | as compared to fluoxetine. Patients with major depressive disorder were randomized to receive sertraline or fluoxetine. Depression severity determined w/ the 21-item Hamilton Rating Scale for Depression (HAMD-21) before and after the treatment. Response calculated based on 50 % reduction in the reported scores. Given allele frequencies were compared between treatment groups in the responsive patients only. |
| rs4291 | 27546928 | captopril | Genotype AA is associated with decreased severity of Kidney Failure when treated with captopril in people with Alzheimer Disease as compared to genotypes AT + TT. | yes | 0.029 | 190 |  | 190 | Unknown | efficacy | *ACE* | The A allele conferred a protective effect of creatinine increases over 1 year. Association with the effects on creatinine also found in conjunction with the rs1800764CT genotype. |
| rs4291 | 18727619 | aspirin | Genotypes AT + TT are associated with increased risk of aspirin intolerance when exposed to aspirin in people with Asthma as compared to genotype AA. | yes | 0.015 | 81 | 231 | 312 | East Asian | toxicity | *ACE* |  |
| rs4291 | 20577119 | amlodipinechlorthalidonelisinopril | Genotypes AA + AT are associated with decreased fasting glucose when treated with amlodipine, chlorthalidone or lisinopril in people with Hypertension as compared to genotype TT. | yes | 0.0014 | 9309 |  | 9309 | Mixed Population | other | *ACE* |  |
| rs1051298 | 19841321 | bevacizumabpemetrexed | Allele G is associated with increased progression-free survival when treated with bevacizumab and pemetrexed in people with Lung Neoplasms as compared to allele A. | yes | 0.01 | 48 |  | 48 | European | efficacy | *SLC19A1* | This clinical trial evaluated the efficacy and toxicity of pemetrexed combined with bevacizumab as second-line therapy for patients with advanced non-small-cell lung cancer (NSCLC) and to correlate allelic variants in pemetrexed-metabolizing genes with clinical outcome. Patients with previously treated NSCLC received pemetrexed (500 mg/m2 intravenous) combined with bevacizumab (15 mg/kg intravenous) every 3 weeks. The primary end point, evaluated using a one-stage Fleming design for detecting a true success rate of at least 70%, was the proportion of patients who were progression free and on treatment at 3 months. Polymorphisms in genes responsible for pemetrexed transport (reduced folate carrier [SLC19A1]) and metabolism (folylpolyglutamate synthase [FPGS] and gamma-glutamyl hydrolase [GGH]) evaluated in germline DNA (blood) were correlated with treatment outcome. The primary end point for this study was 3-month PFS, and only patients with the SLC19A1 exon 6 (2522)C3T polymorphism showed a significant association with that end point (GG vs AG vs AA: 57%v29%v 78%, respectively; Fisher's exact test, P = 0.01). Please note that alleles have been complemented to the plus chromosomal strand. |
| rs1051298 | 24732178 | pemetrexed | Genotypes AA + AG is associated with decreased overall survival when treated with pemetrexed in people with Carcinoma, Non-Small-Cell Lung and Mesothelioma as compared to genotype GG. | yes | 0.016 | 136 |  | 136 | Mixed Population | efficacy | *SLC19A1* | Advanced stage non-small-cell lung cancer (n=94), malignant mesothelioma (n=42). No association with progression-free survival was seen. Please note alleles have been complemented to the plus chromosomal strand. |
| rs1131596 | 28525903 | methotrexate | Allele G is not associated with response to methotrexate in children with Precursor Cell Lymphoblastic Leukemia-Lymphoma as compared to allele A. | no | > 0.05 | 317 |  | 317 | East Asian | efficacy | *SLC19A1* | Please note: alleles have been complemented to the + chromosomal strand. |
| rs1131596 | 17404734 | methotrexate | Allele G is not associated with response to methotrexate in people with Arthritis, Rheumatoid. | not stated |  | 106 |  | 106 | Unknown |  | *SLC19A1* | This variant alone is insufficient to predict patient response to MTX therapy. |
| rs1131596 | 28525903 | methotrexate | Genotypes AG + GG are not associated with concentrations of methotrexate in children with Precursor Cell Lymphoblastic Leukemia-Lymphoma as compared to genotype AA. | no | 0.219 | 317 | 317 | East Asian | metabolism/PK |  | *SLC19A1* | There is no association between selected SNPs and methotrexate plasma level at 48 h between the first dose of methotrexate infusion. med. MTX concentration: AG+GG 0.41 (0.09–34.05)) vs. AA (0.6 (0.14–41.63)). Please note: alleles have been complemented to the + chromosomal strand. |
| rs1131596 | 17404734 | Allele G is associated with decreased expression of SLC19A1. |  | not stated |  |  |  |  |  |  | *SLC19A1* |  |
| rs1131596 | 28525903 | methotrexate | Genotypes AG + GG are not associated with risk of mucositis when treated with methotrexate in children with Precursor Cell Lymphoblastic Leukemia-Lymphoma as compared to genotype AA. | no | 0.671 | 317 |  | 317 | East Asian | toxicity | *SLC19A1* | mucositis refers to grade 3-4 oral mucositis. Please note: alleles have been complemented to the + chromosomal strand. |
| rs1065852 | 10223777 | alpha-hydroxymetoprolol | Allele A is associated with decreased clearance of alpha-hydroxymetoprolol in healthy individuals as compared to allele G. | yes | < 0.05 | 40 |  | 40 | East Asian | metabolism/PK | *CYP2D6* | Alleles complemented to plus strand, relationship described for T188 (P34S). As measured by urinary metabolite concentrations. |
| rs1065852 | 24528284 | citalopramescitalopram | Allele A is associated with plasma concentration of S-didesmethyl-citalopram when treated with citalopram or escitalopram in people with Depressive Disorder, Major as compared to allele G. | yes | 2E-16 | 435 |  | 435 | European | other | *CYP2D6* | direction of the association was not given, p = 2.0E-16 |
| rs1065852 | 23277250 | iloperidone | Genotype GG is associated with increased QTc interval when treated with iloperidone in people with Schizophrenia as compared to genotypes AA + AG. | yes | 0.028 | 128 |  | 128 | Unknown | other | *CYP2D6* | The baseline QTc interval was calculated by averaging the results of 3 electrocardiogram (ECG) measurements per day over 3 consecutive days leading up to iloperidone treatment initiation. The QTc interval at maximum iloperidone blood concentration (Tmax) was calculated by averaging 3 ECG measurements per day (taken 2, 3 and 4 hours after iloperidone was administered) over the last 3 consecutive days of the iloperidone treatment period. From these two averaged measurements, the least squares mean (LSM) change in QTc interval was calculated for each genotype. Patients with the GG genotype had a significantly higher LSM change from baseline, and therefore a greater increase in QTc interval after iloperidone administration, compared to those with the AA or AG genotypes. Please note alleles have been complemented to the positive chromosomal strand. |

*Abbreviations*: *SULT1A1*: Sulfotransferase Family 1A Member 1, *ACE*:Angiotensin-converting enzyme, *SLC19A1*: Solute Carrier Family 19 Member 1, *CYP2D6*: Cytochrome P450 Family 2 Subfamily D Member 6.

*Note*: The variant annotation of SNPs were retrieved from PharmGKB database.

**Supplemental Figure 1.** The genotype frequency distribution of rs750155 (*SULT1A1* ) among 27 populations. The value of the Y axis represents the genotype frequency (%).


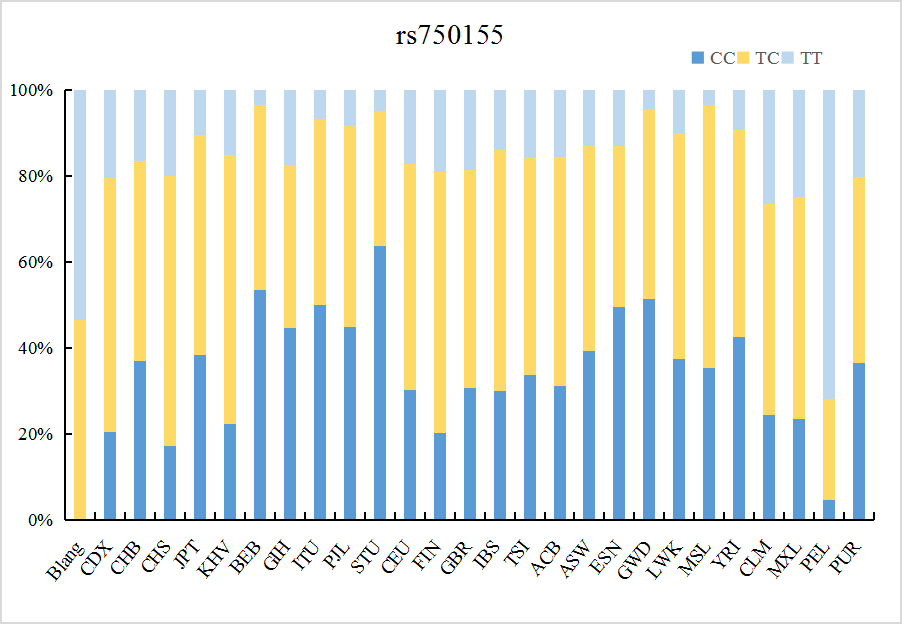


**Supplemental Figure 2.** The genotype frequency distribution of rs1800764 (*ACE* ) among 27 populations. The value of the Y axis represents the genotype frequency (%).


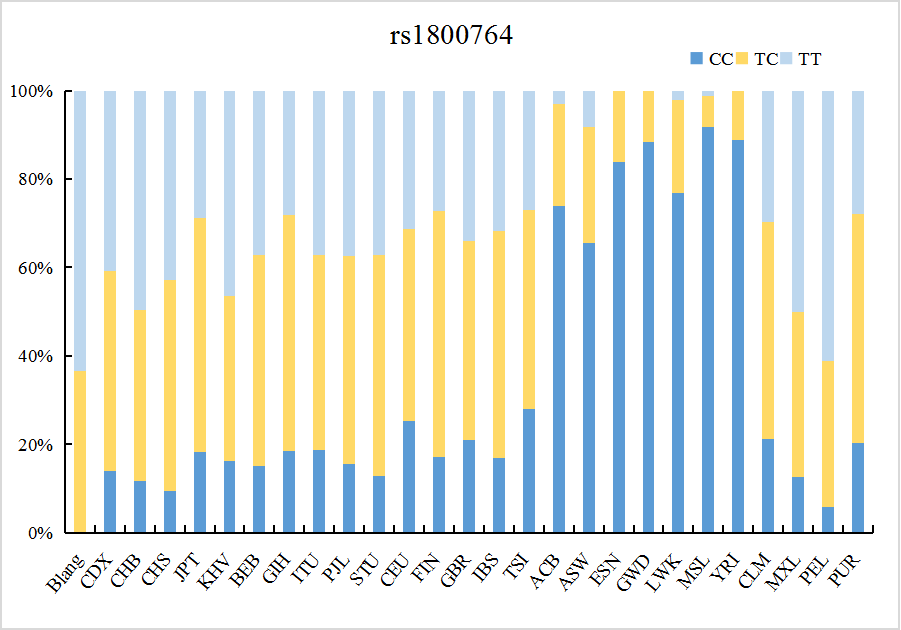


**Supplemental Figure 3.** The genotype frequency distribution of rs4291 (*ACE* ) among 27 populations. The value of the Y axis represents the genotype frequency (%).


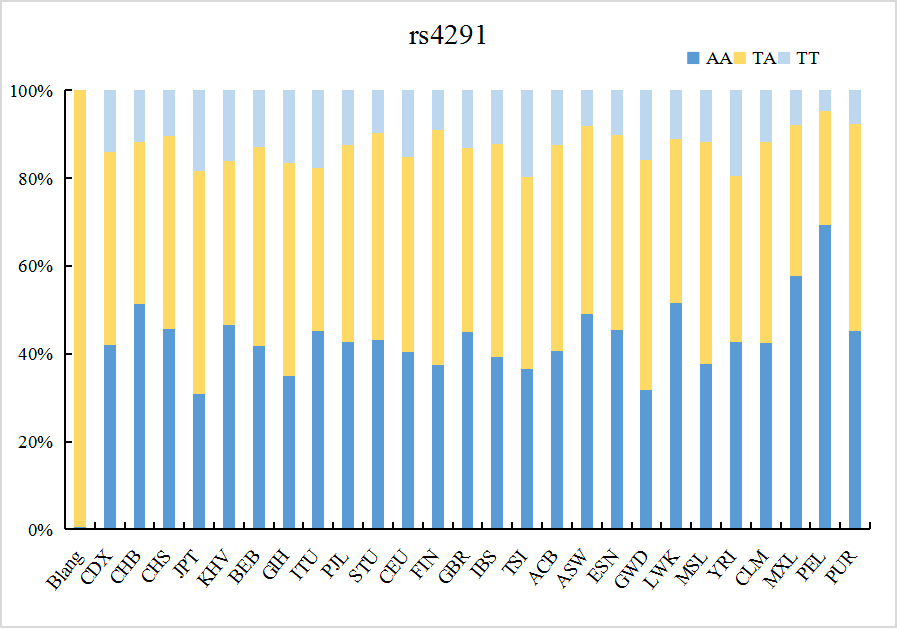


**Supplemental Figure 4.** The genotype frequency distribution of rs1051298 (*SLC19A1*) among 27 populations. The value of the Y axis represents the genotype frequency (%).


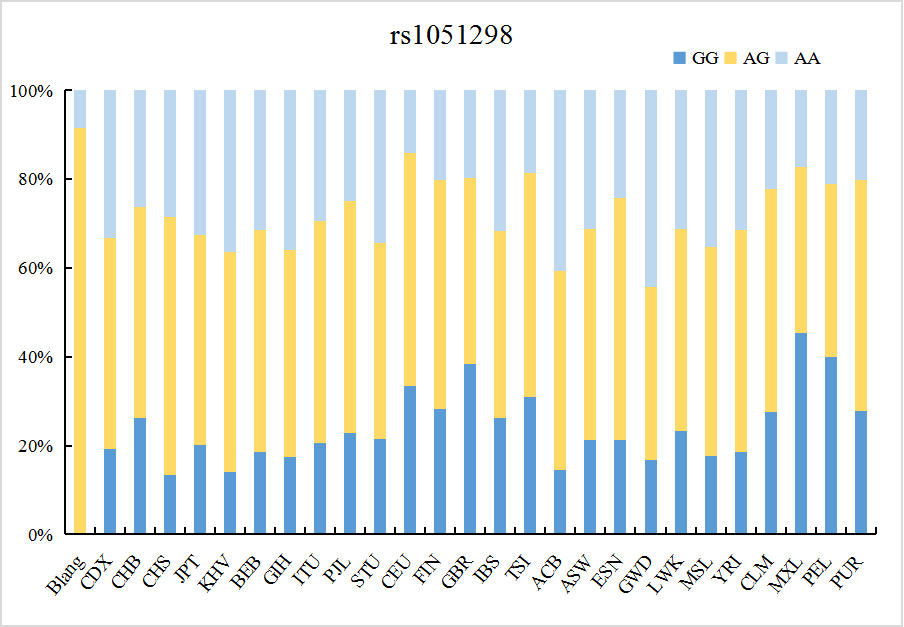


**Supplemental Figure 5.** The genotype frequency distribution of rs1051296 (*SLC19A1*) among 27 populations. The value of the Y axis represents the genotype frequency (%).


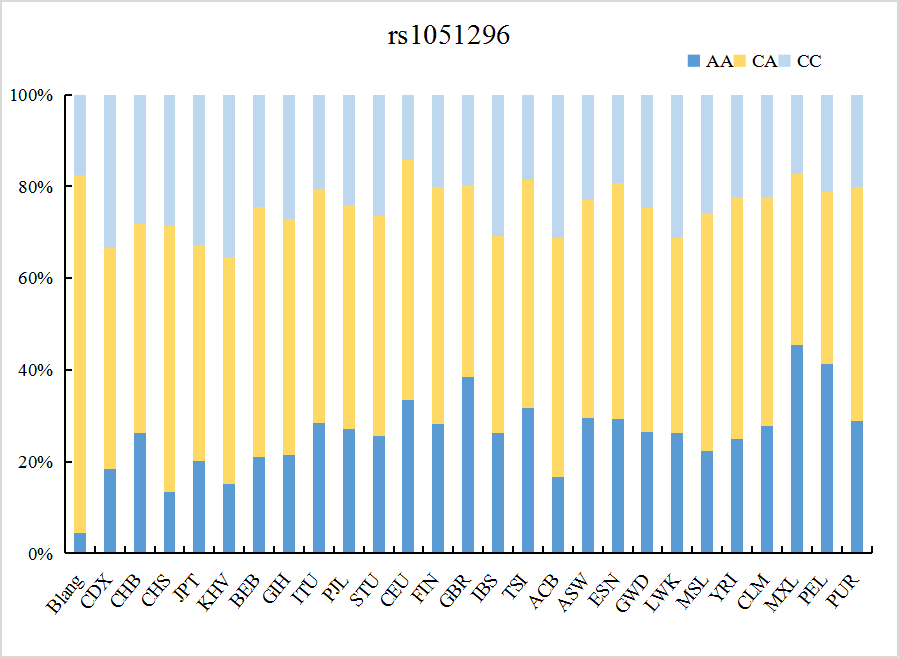


**Supplemental Figure 6.** The genotype frequency distribution of rs1131596 (*SLC19A1*) among 27 populations. The value of the Y axis represents the genotype frequency (%).


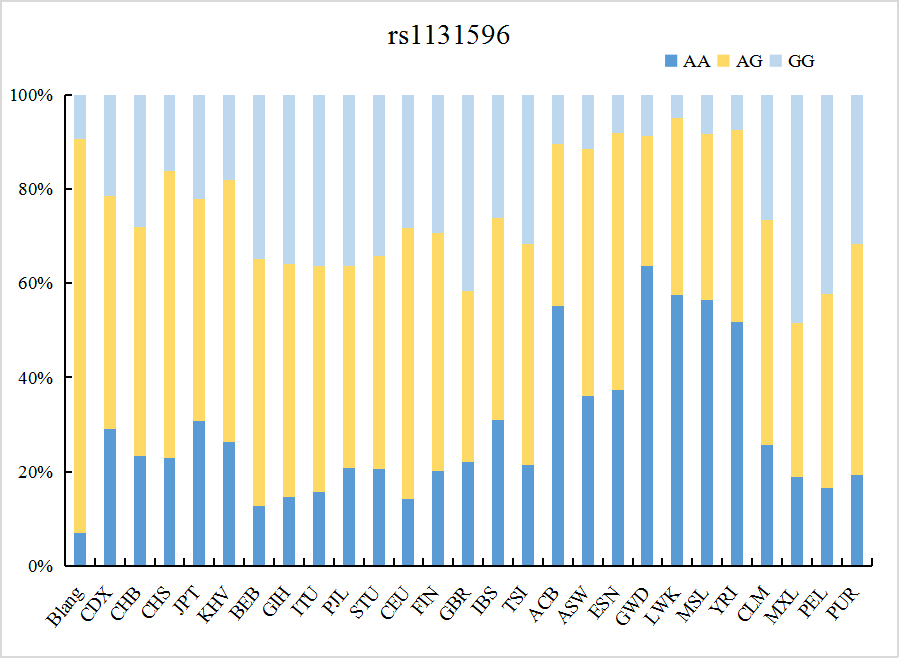


**Supplemental Figure 7.** The genotype frequency distribution of rs1065852 (*CYP2D6* ) among 27 populations. The value of the Y axis represents the genotype frequency (%).


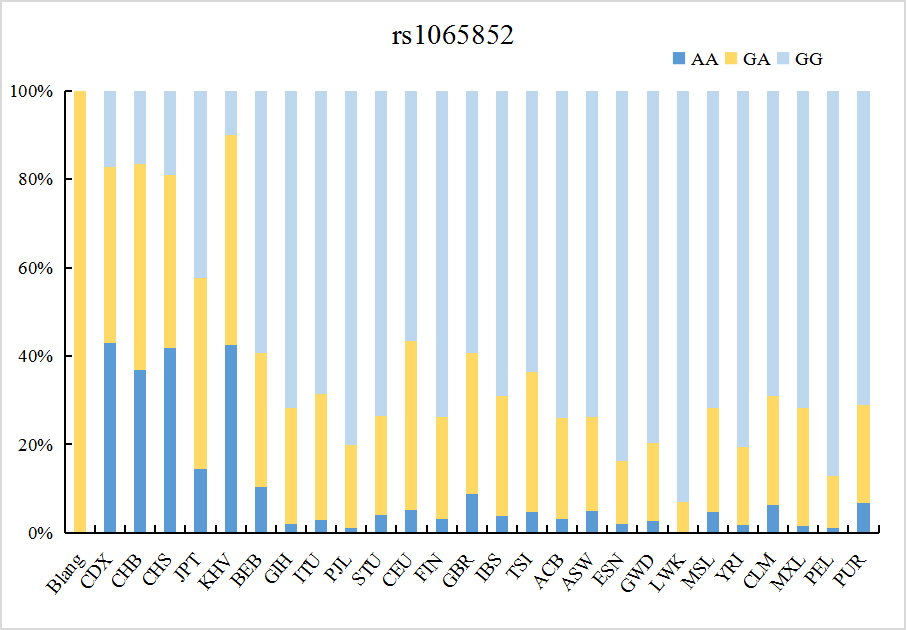

Supplement: Supplementary file 1 [file get_supplementary_file.php]
